# Supplementary material for: Monitoring of the Surface Charge Density Changes of Human Glioblastoma Cell Membranes upon Cinnamic and Ferulic Acids Treatment
Source: MDPI journal article supplement (doi:10.3390/ijms21186972), 2020-09-22
Supplement: s1 [file s1]

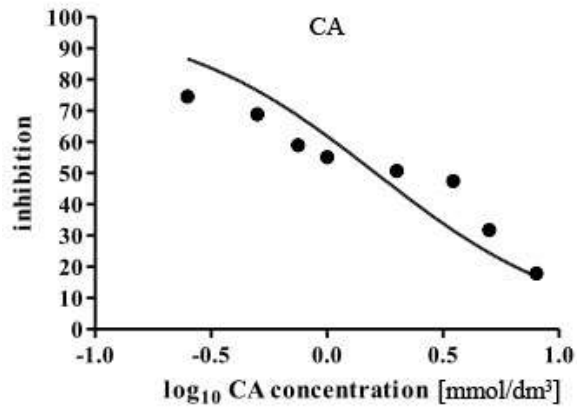

(a)

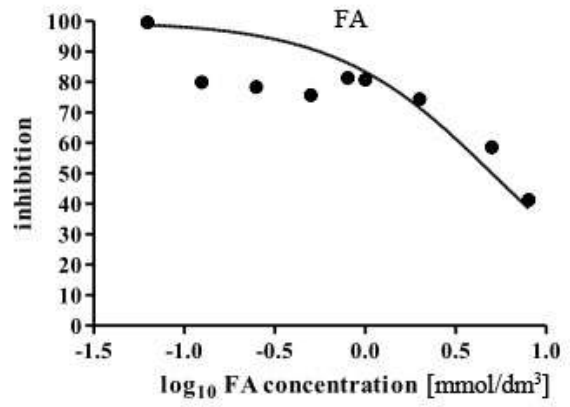

(b)

S1. Dose-response curves for (a) CA and (b) FA.
